# Supplementary material for: Hedgehog Signaling Controls Chondrogenesis and Ectopic Bone Formation via the Yap-Ihh Axis
Source: MDPI journal article supplement (doi:10.3390/biom14030347), 2024-03-14
Supplement: s1 [file s1]

Supplementary Figure 1

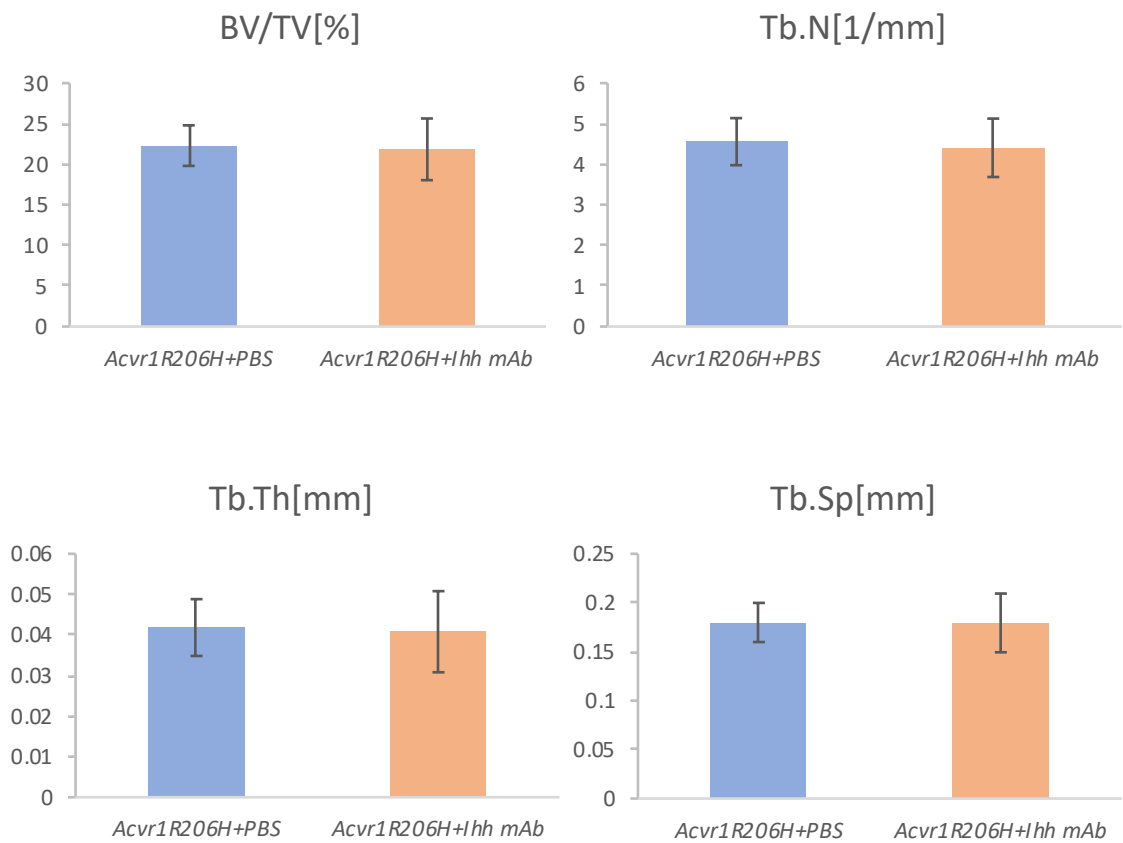

**Figure S1.** Bone mass is not affected by Ihh mAb treatment. Bone volume fraction (BV/TV), trabecular number (Tb.N), trabecular thickness (Tb.Th), trabecular separation (Tb.Sp) were measured from the indicated mice with PBS or Ihh mAb treatment.

Supplementary Figure 2

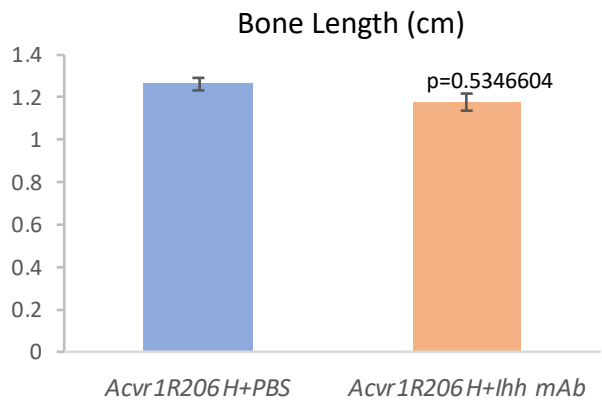

**Figure S2.** Bone length is slightly decreased with Ihh mAb treatment. Bone length of tibia was measured from indicated mice with PBS or Ihh mAB treatment. P=0.5346604, one-way ANOVA followed by Tukey’s multiple comparisons tests.

Supplementary Figure 3

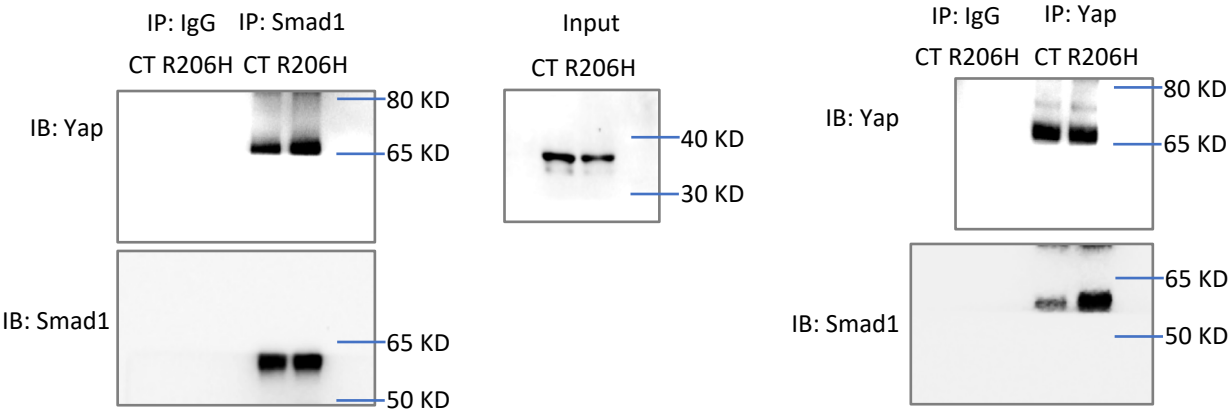

Figure S3. Western Blot images of Figure 5D.

Supplementary Table 1

Table S1: qRT-PCR primer sequences and ChIP-qPCR primer sequences.

| qRT-PCR primers   | Forward 5'-3'            | Reverse 5'-3'             |
|-------------------|--------------------------|---------------------------|
| Gapdh             | GCCTTCCGTGTTCTACCC       | TGCCTGCTTCACCACTTC        |
| Hhip              | GGGAAAAACAGGTCATCAGC     | ATCCACCAACCAAAGGGC        |
| Ptch1             | CTCTGGAGCAGATTTCCAAGG    | TGCCGCAGTTCTTTTGAATG      |
| Gli1              | GAAAGTCCTATTACGCCTTGA    | CAACCTTCTTGCTCACACATGTAAG |
| Osx               | CCCACTGGCTCCTCGGTTCTCTCC | GCTGAAAGGTCAGCGTATGGCTTC  |
| Runx2             | AACCCACGGCCCTCCCTGAACTCT | ACTGGCGGGGTGTAGGTAAAGGTG  |
| Ctgf              | CTGCCTACCGACTGGAAGAC     | CATTGGTAACTCGGGTGGAG      |
| Cyr61             | GCTCAGTCAGAAGGCAGACC     | GTTCTTGGGGACACAGAGGA      |
| Ihh               | ACGTGCATTGCTCTGTCAAGT    | CTGGAAAGCTCTCAGCCGGTT     |
| Shh               | GATGACTCAGAGGTGCAAAGACAA | TGGTTCATCACAGAGATGGCC     |
| Sox9              | AGTACCCGCATCTGCACAAC     | ACGAAGGGTCTCTTCTCGCT      |
| Col2a1            | ACTGGTAAGTGGGGCAAGAC     | CCACACCAAATTCTGTTC        |
| Aggrecan          | GTGGTGGAGCATGCTAGAACCC   | ATTCGAGGCTCTTCCCAG        |
| ChIP-qPCR primers | Forward 5'-3'            | Reverse 5'-3'             |
| Primer1           | GGCCGGGTAGCCCGGGA        | CCCCAAGAGCCACCCAGA        |
| Primer2           | ACTCCATGCGGGGGCGCCAT     | GCCGGGCAGCTCAGAGTCGA      |
| Primer3           | ACTCTGAGCTGCCCGGCTCG     | CGCGGGTCCCTTCAGTC         |
| Primer4           | GTTAGCACCCCGGCCCGG       | GCGGGTCCCGAGCCCGGAT       |
| Primer5           | GCAGACCGCACCTATCCAT      | GAGGAGCGCGCGGGACA         |
| Primer6           | AGCCGCGCGTCCACCCGC       | AGATTTGCGCCTGGTG          |
| Primer7           | CCTGGACAGGAGATGCCA       | TGCTTCTCCGCAGGGGACA       |
| Primer8           | AACCCGAAAGCTGGAGGTCA     | GTAAGGGCAGTATAGGGT        |
| Primer9           | AGAACTAGGGGATGCGGGT      | CAGGCTGTTATTCTGTAT        |
| Primer10          | AAGTGGGGACATCCACAGA      | TTAGGTGGACGTCTGCCCCG      |
| Primer11          | ACTGCCTGGGAATCACT        | TTCGCTTACTCCCAACA         |
